# Supplementary material for: Transcytosable Peptide-Paclitaxel Prodrug Nanoparticle for Targeted Treatment of Triple-Negative Breast Cancer
Source: MDPI journal article supplement (doi:10.3390/ijms24054646), 2023-02-28
Supplement: s1 [file s1]

## Supporting Information

# Transcytosable Peptide-Paclitaxel Prodrug Nanoparticle for Targeted Treatment of Triple-Negative Breast Cancer

Longkun Wang <sup>1</sup>, Chunqian Zhao <sup>1</sup>, Lu Lu <sup>1</sup>, Honglei Jiang <sup>1</sup>, Fengshan Wang <sup>1,\*</sup>  
and Xinke Zhang <sup>2,\*</sup>

<sup>1</sup> Key Laboratory of Chemical Biology (Ministry of Education), NMPA Key Laboratory for Quality Research and Evaluation of Carbohydrate-Based Medicine, Institute of Biochemical and Biotechnological Drug, School of Pharmaceutical Sciences, Cheeloo College of Medicine, Shandong University, Jinan 250012, China

<sup>2</sup> Key Laboratory of Chemical Biology (Ministry of Education), Department of Pharmacology, School of Pharmaceutical Sciences, Cheeloo College of Medicine, Shandong University, Jinan 250012, China

\* Correspondence: fswang@sdu.edu.cn (F.W.), zhangxinke@sdu.edu.cn (X.Z.); Tel.: +86-0531-88382490 (F.W. & X.Z.)

**TAR/NRP-1**  $K_D = 3.397 \times 10^{-8} M$

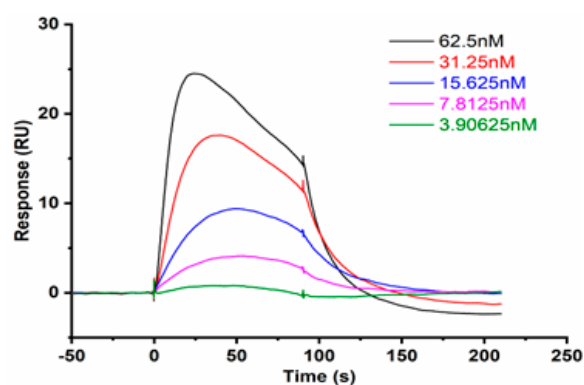

**Figure S1.** The binding curves for TAR peptide to the recombinant proteins NRP-1.

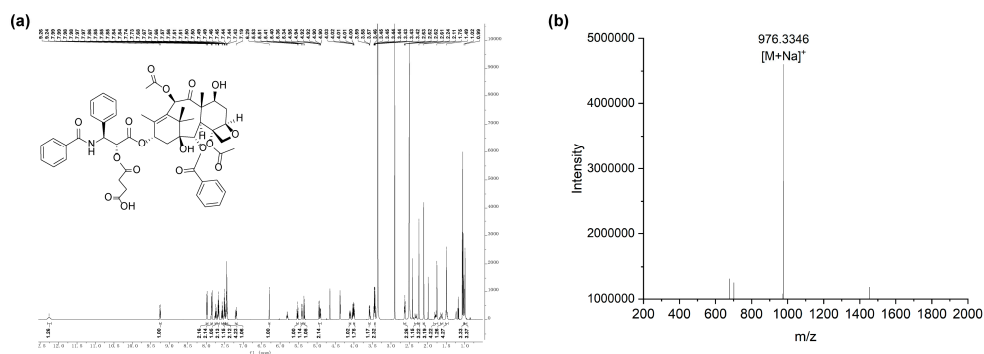

**Figure S2.** Characterization of PTX-SA. (a) The  $^1H$ -NMR spectrum of PTX-SA (600MHz, DMSO- $d_6$ ). (b) The Q-TOF HRMS spectrum of PTX-SA.

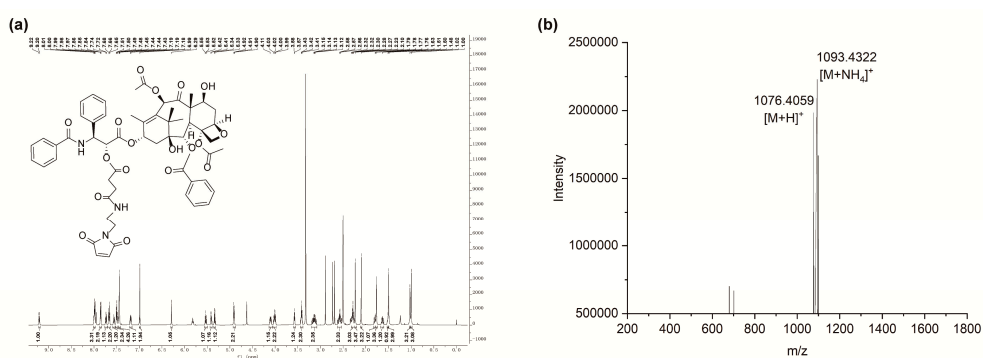

**Figure S3.** Characterization of PTX-SA-MAL. (a) The  $^1H$ -NMR spectrum of PTX-SA-MAL (600MHz, DMSO- $d_6$ ). (b) The Q-TOF HRMS spectrum of PTX-SA-MAL.

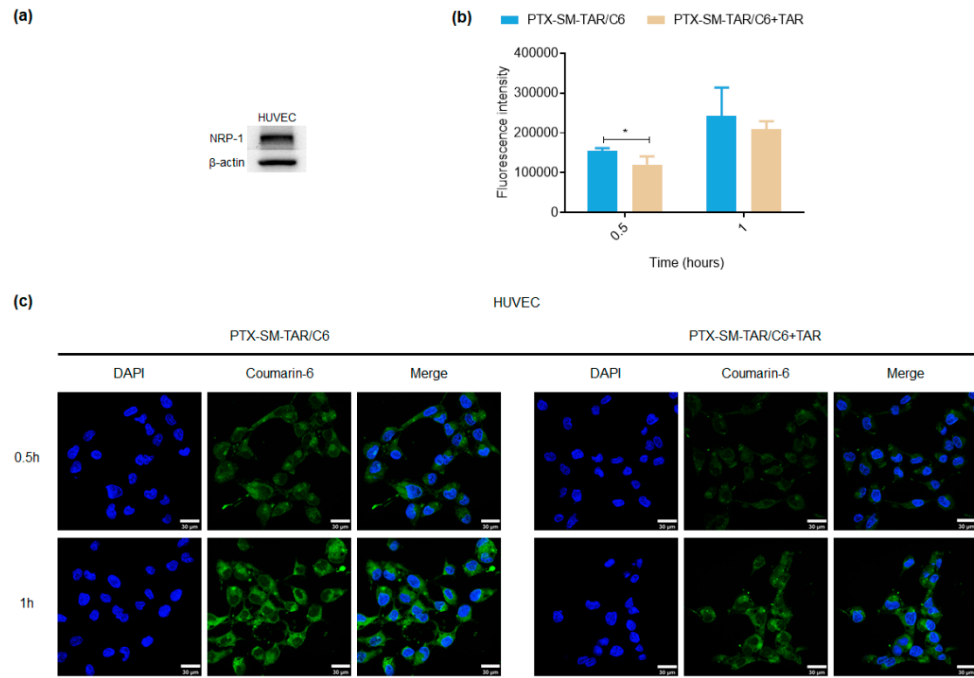

**Figure S4.** Cellular uptake of PTX-SM-TAR/C6 NPs in HUVEC cells. (a) Western blot analysis of NRP-1 expression in HUVEC cells. (b) Flow cytometry analysis of PTX-SM-TAR/C6 NPs and PTX-SM-TAR/C6 NPs plus TAR groups (mean  $\pm$  SEM,  $n = 3$ , \* indicates  $p < 0.05$ ). (c) Confocal images of HUVEC cells. The cell nuclei were stained with DAPI (blue), and the PTX-SM-TAR NPs were dyed with coumarin-6 (green). The scale bar is 30  $\mu$ m.

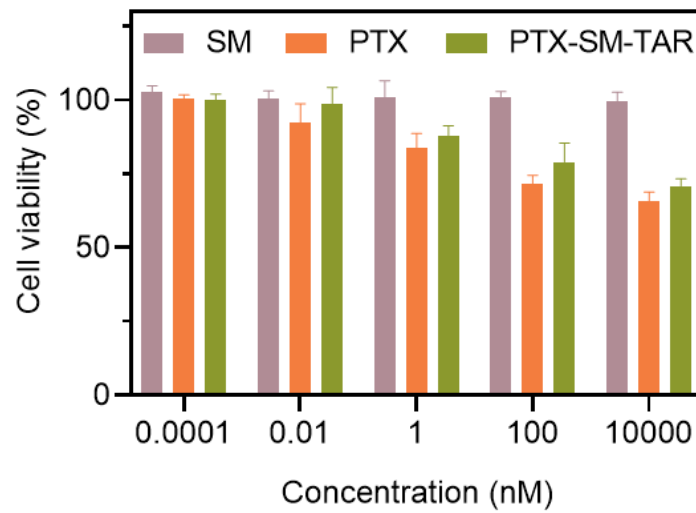

**Figure S5.** Cytotoxicity effect of SM, PTX, and PTX-SM-TAR NPs to EA.hy926 cells (mean  $\pm$  SEM,  $n = 3$ ).
